# Supplementary material
Source: HighWire-hosted journal article supplement (https://www.annfammed.org/content/suppl/2014/03/04/12.2.121)
Supplement: Rao_Supp_Table.pdf [file Rao_Supp_Table.pdf]

# Supplementary Materials

for

Rao GA, Mann JR, Shoaibi A, et al. Azithromycin and levofloxacin use and increased risk of cardiac arrhythmia and death. *Ann Fam Med*. 2014;12(2):121-127.

| <b>Supplemental Table. Clinical and Demographic Characteristics of Patients When Prescriptions for Study Antibiotics Were Filled and Were Used for Computation of IPTW</b> |                                         |                                      |                                       |                                       |
|----------------------------------------------------------------------------------------------------------------------------------------------------------------------------|-----------------------------------------|--------------------------------------|---------------------------------------|---------------------------------------|
| <b>Characteristic</b>                                                                                                                                                      | <b>All patients<br/>(N = 1,757,689)</b> | <b>Amoxicillin<br/>(n = 979,380)</b> | <b>Azithromycin<br/>(n = 594,792)</b> | <b>Levofloxacin<br/>(n = 201,798)</b> |
| <b>Antibiotic indication, No. (%)</b>                                                                                                                                      |                                         |                                      |                                       |                                       |
| Chronic obstructive pulmonary disease and bronchiectasis                                                                                                                   | 248,126 (14.1)                          | 75,073 (7.7)                         | 144,404 (24.3)                        | 31,987 (15.9)                         |
| Pneumonia                                                                                                                                                                  | 17,736 (1.0)                            | 637 (0.1)                            | 11,044 (1.9)                          | 6,655 (3.3)                           |
| Other respiratory infection                                                                                                                                                | 201,120 (11.4)                          | 119,452 (12.2)                       | 72,522 (12.2)                         | 12,358 (6.1)                          |
| Ear-nose-throat infection                                                                                                                                                  | 515,787 (29.3)                          | 234,815 (24.0)                       | 254,892 (42.9)                        | 32,698 (16.2)                         |
| Gastrointestinal infection                                                                                                                                                 | 967 (0.1)                               | 362 (0.0)                            | 328 (0.1)                             | 336 (0.2)                             |
| Genitourinary infection                                                                                                                                                    | 126,748 (7.2)                           | 51,461 (5.3)                         | 29,147 (4.9)                          | 56,092 (27.8)                         |
| Wound infection                                                                                                                                                            | 41,261 (2.3)                            | 22,087 (2.3)                         | 12,483 (2.1)                          | 7,161 (3.5)                           |
| Other serious infection                                                                                                                                                    | 2,946 (0.2)                             | 1,540 (0.2)                          | 1,185 (0.2)                           | 281 (0.1)                             |
| <b>Demographic</b>                                                                                                                                                         |                                         |                                      |                                       |                                       |
| Age, mean (SD), y                                                                                                                                                          | 56.82 (10.1)                            | 56.53 (9.96)                         | 56.44 (10.33)                         | 59.44 (9.84)                          |
| Race, No. (%)                                                                                                                                                              |                                         |                                      |                                       |                                       |
| White or European American                                                                                                                                                 | 1,248,229 (71.0)                        | 691,399 (70.6)                       | 419,898 (70.6)                        | 149,817 (74.2)                        |
| African American                                                                                                                                                           | 320,405 (18.2)                          | 181,561 (18.5)                       | 108,915 (18.3)                        | 33,044 (16.4)                         |
| American Indian or Alaskan native                                                                                                                                          | 4,564 (0.3)                             | 2,648 (0.3)                          | 1,670 (0.3)                           | 305 (0.2)                             |
| Hawaiian or Pacific Islander                                                                                                                                               | 5,211 (0.3)                             | 2,961 (0.3)                          | 2,003 (0.3)                           | 318 (0.2)                             |
| Asian                                                                                                                                                                      | 6,606 (0.4)                             | 3,723 (0.4)                          | 2,512 (0.4)                           | 450 (0.2)                             |
| Multiracial, combination of white and African American only                                                                                                                | 36,063 (2.1)                            | 20,464 (2.1)                         | 11,640 (2.0)                          | 4,320 (2.1)                           |
| Multiracial, any combination other than just African American and white only                                                                                               | 43,842 (2.5)                            | 24,692 (2.5)                         | 13,257 (2.2)                          | 6,644 (3.3)                           |
| Unknown                                                                                                                                                                    | 92,769 (5.3)                            | 51,932 (5.3)                         | 34,897 (5.9)                          | 6,900 (3.4)                           |
| Male sex, No. (%)                                                                                                                                                          | 1,556,244 (88.5)                        | 874,698 (89.3)                       | 513,603 (86.4)                        | 183,984 (91.2)                        |

| <b>Characteristic, <i>continued</i></b>                    | <b>All patients<br/>(N = 1,757,689)</b> | <b>Amoxicillin<br/>(n = 979,380)</b> | <b>Azithromycin<br/>(n = 594,792)</b> | <b>Levofloxacin<br/>(n = 201,798)</b> |
|------------------------------------------------------------|-----------------------------------------|--------------------------------------|---------------------------------------|---------------------------------------|
| Body mass index, mean (SD)                                 | 31.94 (5.51)                            | 32 (5.49)                            | 32.08 (5.54)                          | 31.13 (5.42)                          |
| Hispanic ethnicity, No. (%)                                | 104,381 (5.9)                           | 60,351 (6.2)                         | 31,024 (5.2)                          | 14,511 (7.2)                          |
| Smoking status, No. (%)                                    |                                         |                                      |                                       |                                       |
| Never                                                      | 390,866 (22.2)                          | 217,115 (22.2)                       | 131,267 (22.1)                        | 47,422 (23.5)                         |
| Current                                                    | 820,760 (46.7)                          | 456,001 (46.6)                       | 286,808 (48.2)                        | 85,580 (42.4)                         |
| Former                                                     | 546,063 (31.1)                          | 306,264 (31.3)                       | 176,717 (29.7)                        | 68,796 (34.1)                         |
| Comorbidity, No. (%)                                       |                                         |                                      |                                       |                                       |
| Chronic obstructive pulmonary disease and bronchiectasis   | 31,427 (1.8)                            | 10,670 (1.1)                         | 15,943 (2.7)                          | 5,191 (2.6)                           |
| Diabetes mellitus with complications                       | 15,591 (0.9)                            | 9,314 (1.0)                          | 4,141 (0.7)                           | 2,288 (1.1)                           |
| Diabetes mellitus without complication                     | 58,921 (3.4)                            | 34,073 (3.5)                         | 17,963 (3.0)                          | 7,432 (3.7)                           |
| Essential hypertension                                     | 85,258 (4.9)                            | 48,858 (5.0)                         | 25,724 (4.3)                          | 11,614 (5.8)                          |
| Hypertension with complications and secondary hypertension | 1,262 (0.1)                             | 663 (0.1)                            | 400 (0.1)                             | 221 (0.1)                             |
| Congestive heart failure; nonhypertensive                  | 7,137 (0.4)                             | 3,545 (0.4)                          | 2,485 (0.4)                           | 1,225 (0.6)                           |
| Acute myocardial infarction                                | 445 (0.0)                               | 225 (0.0)                            | 140 (0.0)                             | 89 (0.0)                              |
| Cardiac device related                                     | 74 (0.0)                                | 35 (0.0)                             | 23 (0.0)                              | 16 (0.0)                              |
| Cardiac arrhythmia, atrial fibrillation                    | 8,338 (0.5)                             | 4,640 (0.5)                          | 2,508 (0.4)                           | 1,259 (0.6)                           |
| Cardiac arrhythmia, atrial flutter                         | 697 (0.0)                               | 376 (0.0)                            | 244 (0.0)                             | 84 (0.0)                              |
| Occlusion or stenosis of precerebral arteries              | 1,226 (0.1)                             | 682 (0.1)                            | 386 (0.1)                             | 167 (0.1)                             |
| Acute cerebrovascular disease                              | 2,578 (0.1)                             | 1,504 (0.2)                          | 675 (0.1)                             | 434 (0.2)                             |
| Peripheral and visceral atherosclerosis                    | 4,490 (0.3)                             | 2,611 (0.3)                          | 1,140 (0.2)                           | 787 (0.4)                             |
| Transient cerebral ischemia                                | 741 (0.0)                               | 427 (0.0)                            | 213 (0.0)                             | 111 (0.1)                             |
| Late effects of cerebrovascular disease                    | 1,060 (0.1)                             | 607 (0.1)                            | 246 (0.0)                             | 252 (0.1)                             |
| Other and ill-defined cerebrovascular disease              | 318 (0.0)                               | 188 (0.0)                            | 76 (0.0)                              | 62 (0.0)                              |
| Chronic renal failure                                      | 2,810 (0.2)                             | 1,498 (0.2)                          | 860 (0.1)                             | 506 (0.3)                             |
| Hepatitis                                                  | 4,360 (0.2)                             | 2,600 (0.3)                          | 1,324 (0.2)                           | 473 (0.2)                             |
| Personality disorders                                      | 1,727 (0.1)                             | 986 (0.1)                            | 590 (0.1)                             | 173 (0.1)                             |
| Mood disorders                                             | 46,392 (2.6)                            | 26,549 (2.7)                         | 15,793 (2.7)                          | 4,511 (2.2)                           |
| Drug, No. (%)                                              |                                         |                                      |                                       |                                       |
| Insulin                                                    | 25,970 (1.5)                            | 15,020 (1.5)                         | 8,093 (1.4)                           | 3,112 (1.5)                           |
| Hypoglycemic, oral                                         | 54,285 (3.1)                            | 30,906 (3.2)                         | 16,912 (2.8)                          | 7,043 (3.5)                           |
| Antipsychotics                                             | 24,830 (1.4)                            | 14,210 (1.5)                         | 8,115 (1.4)                           | 2,775 (1.4)                           |
| $\beta$ -Agonists                                          | 38,002 (2.2)                            | 15,653 (1.6)                         | 17,338 (2.9)                          | 5,424 (2.7)                           |
| $\beta$ -Blockers                                          | 55,754 (3.2)                            | 31,361 (3.2)                         | 17,989 (3.0)                          | 7,003 (3.5)                           |
| Calcium channel blockers                                   | 38,886 (2.2)                            | 21,292 (2.2)                         | 12,389 (2.1)                          | 5,730 (2.8)                           |
| Digoxin                                                    | 5,025 (0.3)                             | 2,761 (0.3)                          | 1,353 (0.2)                           | 1,036 (0.5)                           |

| <b>Characteristic, <i>continued</i></b>      | <b>All patients<br/>(N = 1,757,689)</b> | <b>Amoxicillin<br/>(n = 979,380)</b> | <b>Azithromycin<br/>(n = 594,792)</b> | <b>Levofloxacin<br/>(n = 201,798)</b> |
|----------------------------------------------|-----------------------------------------|--------------------------------------|---------------------------------------|---------------------------------------|
| Loop diuretic                                | 17,432 (1.0)                            | 9,323 (1.0)                          | 5,334 (0.9)                           | 3,073 (1.5)                           |
| Other non-loop diuretic                      | 36,353 (2.1)                            | 20,363 (2.1)                         | 12,031 (2.0)                          | 4,284 (2.1)                           |
| Angiotensin-converting enzyme inhibitor      | 68,332 (3.9)                            | 38,422 (3.9)                         | 21,737 (3.7)                          | 8,873 (4.4)                           |
| Angiotensin receptor blocker                 | 9,285 (0.5)                             | 5,233 (0.5)                          | 3,561 (0.6)                           | 601 (0.3)                             |
| Antiarrhythmic                               | 2,076 (0.1)                             | 1,169 (0.1)                          | 575 (0.1)                             | 379 (0.2)                             |
| Anticoagulant                                | 15,739 (0.9)                            | 8,883 (0.9)                          | 4,397 (0.7)                           | 2,651 (1.3)                           |
| Antiplatelet                                 | 11,744 (0.7)                            | 6,445 (0.7)                          | 3,955 (0.7)                           | 1,445 (0.7)                           |
| Antianginal                                  | 17,624 (1.0)                            | 9,380 (1.0)                          | 5,415 (0.9)                           | 3,232 (1.6)                           |
| Anti-lipid                                   | 91,952 (5.2)                            | 52,006 (5.3)                         | 30,114 (5.1)                          | 10,660 (5.3)                          |
| Corticosteroids, systemic                    | 8,982 (0.5)                             | 3,956 (0.4)                          | 3,723 (0.6)                           | 1,427 (0.7)                           |
| <b>Laboratory values, mean (SD)</b>          |                                         |                                      |                                       |                                       |
| Albumin (g/dL)                               | 4.07 (0.38)                             | 4.07 (0.37)                          | 4.07 (0.38)                           | 4.02 (0.38)                           |
| Alanine transaminase (IU/mL)                 | 31.29 (17.73)                           | 31.51 (17.92)                        | 31.16 (17.69)                         | 30.63 (16.81)                         |
| Aspartate transaminase (IU/mL)               | 26.92 (13.44)                           | 27.05 (13.53)                        | 26.77 (13.31)                         | 26.81 (13.33)                         |
| Serum creatinine (mg/dL)                     | 1.05 (0.35)                             | 1.05 (0.35)                          | 1.04 (0.31)                           | 1.1 (0.44)                            |
| Hemoglobin A <sub>1c</sub> (%)               | 6.81 (0.86)                             | 6.82 (0.89)                          | 6.78 (0.82)                           | 6.82 (0.89)                           |
| High-density lipoprotein                     | 43.56 (12.43)                           | 43.35 (12.3)                         | 43.64 (12.72)                         | 44.46 (12.01)                         |
| Hemoglobin (g/dL)                            | 14.49 (1.39)                            | 14.5 (1.39)                          | 14.5 (1.37)                           | 14.38 (1.43)                          |
| International normalized ratio               | 1.22 (1.25)                             | 1.21 (1.14)                          | 1.22 (1.38)                           | 1.29 (1.37)                           |
| Low-density lipoprotein                      | 107.76 (31.22)                          | 107.75 (31.37)                       | 107.42 (31.44)                        | 108.63 (29.36)                        |
| Platelet count (10 <sup>9</sup> /L)          | 241.77 (65.99)                          | 241.49 (65.53)                       | 242.31 (66.01)                        | 241.43 (68.23)                        |
| Potassium (mEq/L)                            | 4.25 (0.41)                             | 4.25 (0.41)                          | 4.23 (0.41)                           | 4.29 (0.42)                           |
| IPTW = inverse probability treatment weight. |                                         |                                      |                                       |                                       |
